# Supplementary material for: Combined deletion of Xrcc4 and Trp53 in mouse germinal center B cells leads to novel B cell lymphomas with clonal heterogeneity
Source: Springer Nature journal article supplement (doi:10.1186/s13045-015-0230-5), 2016-01-07
Supplement: MOESM1 [file 9777618]

## SUPPLEMENTAL FIGURE LEGENDS

**Figure S1. Establishment of G1XP lymphoma model.** (A) Specific *Xrcc4* deletion via *Cγ1Cre* in GC B cells. PCR analysis of genomic DNA isolated from bone marrow (BM), thymus, sorted naïve B cells ( $B220^{+}PNA^{low}$ ), and GC B cells ( $B220^{+}PNA^{high}$ ) of immunized *Cγ1Cre* KI or *Cγ1CreX<sup>c/+</sup>* mice. The middle band is non-specific amplification of PCR reaction for BM, thymus and  $B220^{+}PNA^{low}$  B cells. GC B cells ( $B220^{+}PNA^{high}$ ) show the complete deletion of *Xrcc4* floxed allele. Splenocytes were stained using anti-B220 and anti-PNA antibodies. (B) Kaplan Meier survival curve of the first cohort of mice including *Cγ1CreX<sup>c/+</sup>P<sup>c/+</sup>* mice (n=19, blue line), *Cγ1CreX<sup>c/+</sup>P<sup>c</sup>* mice (n=20, green line) and *Cγ1CreX<sup>c</sup>P<sup>c</sup>* mice (n=47, red line). (C) Southern Blot analysis of 1<sup>st</sup> cohort of *Cγ1CreX<sup>c</sup>P<sup>c</sup>* mice. G1XP lymphomas harbor clonal J<sub>H</sub> rearrangements. Southern blot analyses for J<sub>H</sub> rearrangements in G1XP lymphoma genomic DNA employing EcoRI digestion and the J<sub>H4</sub> probe. Germline (GL) bands are indicated (arrow heads). Asterisks (\*) indicate rearranged J<sub>H</sub> locus in lymphoma DNA. MLN stands for mesenteric lymph node.

**Figure S2. G1XP lymphomas harbor somatic hypermutations.** Germline sequences from either the J<sub>H1-4</sub> or J<sub>H3-4</sub> region were aligned with G1XP lymphoma sequences. The mismatched sequences (in red font) at the beginning of the sequences are derived from rearranged VD or D regions. To exclude the effects of V(D)J recombination in sequence diversity, we only identified the mutations in J<sub>H</sub> exon or intron regions that could be unequivocally aligned to the germline sequences. The rearranged J<sub>H</sub> exon regions are

underlined for each individual G1XP lymphoma samples, and the mutations are marked with “\*”.

**Figure S3. G1XP lymphomas harbor normal or aberrant V(D)J recombination junctions.** NGS data showed the presence of normal D-J (junction 1) and V-D-J (junction 2) junctions at the *Igh* locus or aberrant V-J junction (junction 3) at *Igλ* locus. V, D, and J exons were labeled and depicted as orange bars. MH: micro-homology.

**Figure S4. Clonal *Igλ* translocations in G1XP lymphoma.** **Top:** schematics of *Igλ* locus on chromosome 16. **Bottom:** Metaphases from G1XP lymphoma samples were analyzed by FISH for hybridization to *Igλ* probes as indicated in the schematics. Representative *Igλ* translocations in G1XP lymphomas are shown.

## SUPPLEMENTAL METHODS

### Generation of mouse models.

C $\gamma$ 1Cre knock-in (KI) mice have the IRES-Cre cDNA inserted into the 3' UTR region of C $\gamma$ 1 exon without affecting IgG1 expression [1]. We intercrossed these strains to generate the *C $\gamma$ 1Cre/Xrcc4<sup>c/c or c/-</sup>/p53<sup>c/c</sup>* cohort and control mice for survival study, and *C $\gamma$ 1Cre/Xrcc4<sup>c/c or c/-</sup>* or *C $\gamma$ 1Cre/p53<sup>c/c</sup>* single deficient mice for *Igh* locus instability analysis. The genetic background of these mice is mixed with 129, B6, and FVB/N [1-3].

### FACS

Antibodies used for flow cytometry were obtained from BD Bioscience including, anti-B220-PE, anti-B220-FITC, anti-B220-APC, anti-CD23, anti-CD22, anti-CD24, anti-CD38, anti-CD43-PE, anti-CD93-PE, anti-CD138, anti-FAS, anti-IgM-FITC, anti-IgG1-FITC, anti-IgG2a/2b-FITC, anti-IgA-PE, anti-IgD, and anti-Ig $\kappa$ . Also used were anti-Ig $\lambda$  (Southern Biotechnology) and anti-PNA-FITC (Vector).

### Probes for southern blotting and BAC probes for FISH

J<sub>H4</sub> probe was the HindIII-EcoRI (1.6kb) fragment of 3' J<sub>H4</sub> region. FISH probes were as follows: a BAC that covered the 3' region of the *Igh* locus encompassing 3' *Igh* enhancer and 100kb downstream (3' *Igh* BAC), a BAC just upstream of the *Igh* V<sub>H</sub> region (5' *Igh* BAC) as described previously [4]. All BACs outlined below were obtained from the BACPAC CHORI database. BACs for *Ig $\lambda$*  regions are RP23-382P9 (5' *Ig $\lambda$* ) and RP23-374P12 (3' *Ig $\lambda$* ). BACs for *c-myc* regions are RP24-434C10 (5' *c-myc*) and RP23-457I7

(3' *c-myc*). BACs for *Pvt-1* regions are RP23-98D8 (5' *Pvt-1*) and RP24-413E20 (3' *Pvt-1*). In all FISH experiments, intact loci show co-localization of the red and green probes, while split red and green signals are scored as broken loci. Broken loci can be free, with the centromeric and telomeric portion of the locus either present in the metaphases or lost. Alternatively, broken loci (both the centromeric and telomeric parts or only one of them) can be involved in translocations with other chromosomes.

### ***Ig* cloning and sequencing**

VDJ exon sequencing and cloning were performed as described previously [5]. For mutational analysis, Iproof high fidelity polymerase was employed (Biorad). Sequences were analyzed with Lasergene DNA-STAR/SeqMan software and were aligned with the corresponding genomic sequences of J<sub>H</sub> regions (accession number: AJ851868, <http://www.ncbi.nlm.nih.gov/nuccore/126349412>).

### **NGS analysis including CREST software and generation of Circos plots.**

We have another study to focus on the analysis of NGS data (Chen et al., manuscript in preparation) in which we sequenced wt control B cells from various genetic backgrounds to control for NGS pipelines. In the current study, we sequenced 6 tumor samples, 46J, 90J, 119J, 125J, 196J, and 202J, with coverages ranging between 30× and 40× in depth. The raw sequencing data was analyzed via CREST software [6] and aligned to mouse mm9 reference sequences. CREST software has been employed to analyze NGS data of human leukemia or lymphoma samples [6]. In addition, CREST has been applied to analyze NGS data obtained from other types of human cancers using the

same Illumina HiSeq 2000 platform as we did, which indeed detected structural variations [7, 8]. Therefore, we used this software to identify structural variations in our mouse lymphoma samples. The list of potential rearrangements provided by CREST was extensively filtered for those most likely to be true novel rearrangements. Each variant was required to be unique to a single tumor sample, and to have evidence of soft-clipping reads at each contributing breakpoint end. In addition, majority of the CTXs was supported by pair-end sequencing analysis. Lastly, we were able to confirm the occurrence of NGS-identified CTXs with independent methodology (e.g. FISH or PCR). Circos plots were generated using the software described previously [9]. The Integrative Genome Viewer (IGV) software was employed [10] to visually examine the location of CTX events in the context of annotated genetic loci.

## Reference

1. Casola S, Cattoretti G, Uyttersprot N, Koralov SB, Seagal J, Hao Z, Waisman A, Egert A, Ghitza D, Rajewsky K: **Tracking germinal center B cells expressing germ-line immunoglobulin gamma1 transcripts by conditional gene targeting.** *Proc Natl Acad Sci U S A* 2006, **103**(19):7396-7401.
2. Jonkers J, Meuwissen R, van der Gulden H, Peterse H, van der Valk M, Berns A: **Synergistic tumor suppressor activity of BRCA2 and p53 in a conditional mouse model for breast cancer.** *Nat Genet* 2001, **29**(4):418-425.
3. Yan CT, Boboila C, Souza EK, Franco S, Hickernell TR, Murphy M, Gumaste S, Geyer M, Zarrin AA, Manis JP, Rajewsky K, Alt FW: **IgH class switching and translocations use a robust non-classical end-joining pathway.** *Nature* 2007, **449**(7161):478-482.
4. Franco S, Gostissa M, Zha S, Lombard DB, Murphy MM, Zarrin AA, Yan C, Tepsuporn S, Morales JC, Adams MM, Lou Z, Bassing CH, Manis JP, Chen J, Carpenter PB, Alt FW: **H2AX prevents DNA breaks from progressing to chromosome breaks and translocations.** *Mol Cell* 2006, **21**(2):201-214.
5. Wang JH, Alt FW, Gostissa M, Datta A, Murphy M, Alimzhanov MB, Coakley KM, Rajewsky K, Manis JP, Yan CT: **Oncogenic transformation in the absence of Xrcc4 targets peripheral B cells that have undergone editing and switching.** *J Exp Med* 2008, **205**(13):3079-3090.
6. Wang J, Mullighan CG, Easton J, Roberts S, Heatley SL, Ma J, Rusch MC, Chen K, Harris CC, Ding L, Holmfeldt L, Payne-Turner D, Fan X, Wei L, Zhao D, Obenauer JC, Naeve C, Mardis ER, Wilson RK, Downing JR, Zhang J: **CREST maps somatic structural variation in cancer genomes with base-pair resolution.** *Nat Methods* 2011, **8**(8):652-654.
7. Wang Y, Waters J, Leung ML, Unruh A, Roh W, Shi X, Chen K, Scheet P, Vattathil S, Liang H, Multani A, Zhang H, Zhao R, Michor F, Meric-Bernstam F, Navin NE: **Clonal evolution in breast cancer revealed by single nucleus genome sequencing.** *Nature* 2014, **512**(7513):155-160.
8. Xie T, Cho YB, Wang K, Huang D, Hong HK, Choi YL, Ko YH, Nam DH, Jin J, Yang H, Fernandez J, Deng S, Rejto PA, Lee WY, Mao M: **Patterns of somatic alterations between matched primary and metastatic colorectal tumors characterized by whole-genome sequencing.** *Genomics* 2014, **104**(4):234-241.
9. Krzywinski M, Schein J, Birol I, Connors J, Gascoyne R, Horsman D, Jones SJ, Marra MA: **Circos: an information aesthetic for comparative genomics.** *Genome Res* 2009, **19**(9):1639-1645.
10. Thorvaldsdottir H, Robinson JT, Mesirov JP: **Integrative Genomics Viewer (IGV): high-performance genomics data visualization and exploration.** *Briefings in bioinformatics* 2013, **14**(2):178-192.

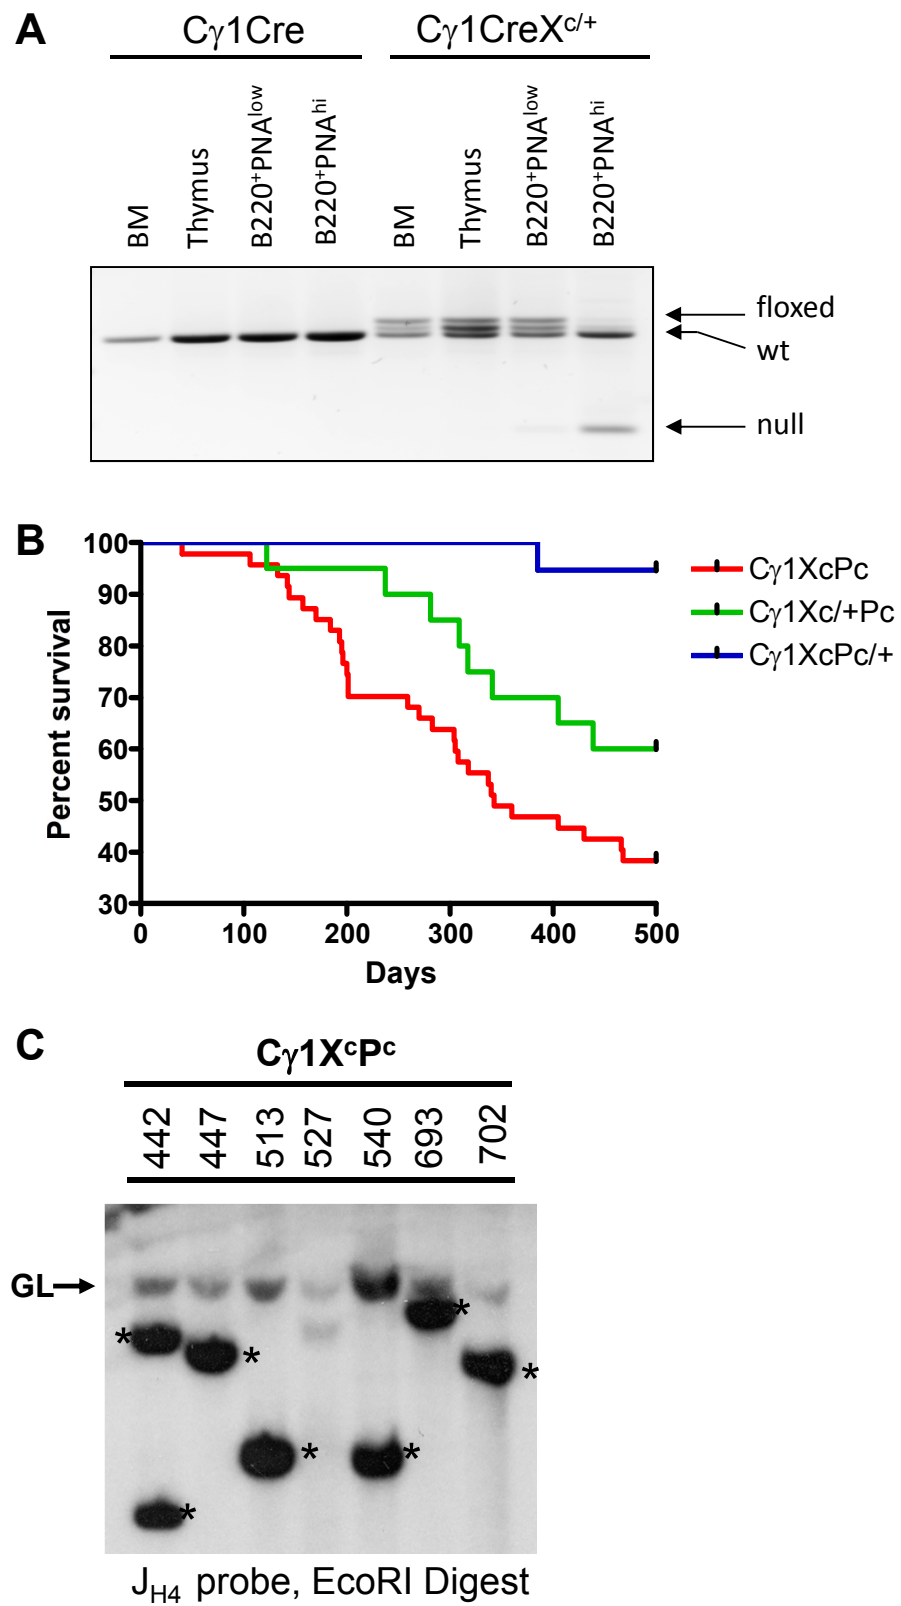

Figure S1A-C

# G1XP 540: 13 mutations in J<sub>H3</sub> intronic region (marked by “\*”)

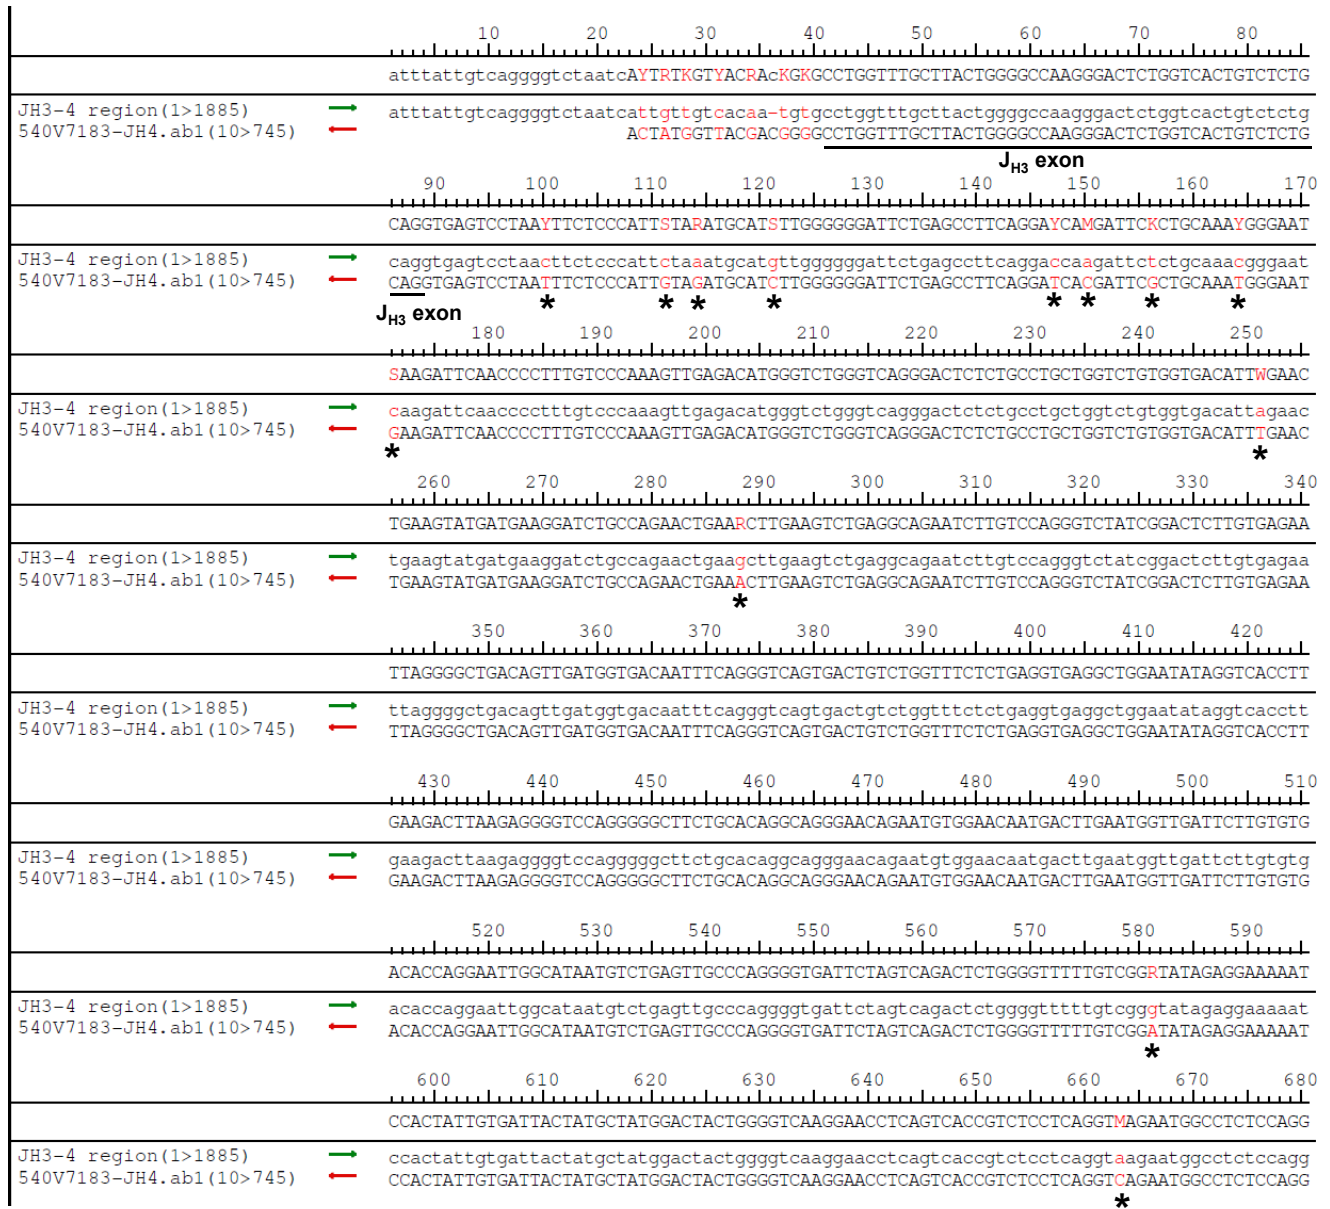

Figure S2



**G1XP 447: 3 mutations in J<sub>H2</sub> exon and intron region (marked by “\*”)**

|                             |   |                                                                                       |     |     |     |     |     |     |     |
|-----------------------------|---|---------------------------------------------------------------------------------------|-----|-----|-----|-----|-----|-----|-----|
|                             |   | 90                                                                                    | 100 | 110 | 120 | 130 | 140 | 150 | 160 |
|                             |   | gtcaccggtctcctcaggtgaagctgGCTTTTtCTTtCTKACMTWCYRKWcTGAAMTGGGWRAAGcAKATKctCWGRWCWSS    |     |     |     |     |     |     |     |
| JH1-4 region (1>2592)       | → | gtcaccggtctcctcaggtgaagctggctttttttcttctgcacattccattctgaaatgggaaaag-atattctcagatctcc  |     |     |     |     |     |     |     |
| 447VH558-VH558.ab1 (24>789) | → | GCTTAT--CTT-CATCAGCTACTGGA-TGAAGTGGGTGAAGCAGAGGC-CTGGACAGG                            |     |     |     |     |     |     |     |
|                             |   | 170                                                                                   | 180 | 190 | 200 | 210 | 220 | 230 | 240 |
|                             |   | SCMTgTSAGKSSATYKGMCA SAYTYTKMTGCWagYRGWAGcTWYTMWSTAmrgATRRGTSTTTCgASKSCMAGGcMaMAKW    |     |     |     |     |     |     |     |
| JH1-4 region (1>2592)       | → | ccatgtcaggccattctgccacactctgcatgct-gcagaagcttttctgtaaggatagggtcttc-actccaggga-aaag    |     |     |     |     |     |     |     |
| 447VH558-VH558.ab1 (24>789) | → | GCCT-TGAGTGGATTGGACAGATTTTCTCGCAAGTGGTAG-TACTAACTACA-ATGAGATGTTTCGAGGGCAAGGCCACATT    |     |     |     |     |     |     |     |
|                             |   | 250                                                                                   | 260 | 270 | 280 | 290 | 300 | 310 | 320 |
|                             |   | GRCWGTcAGAggCtAgCWKCCTSYRGMACAGYSTACAWTCAtGSWMARYAgcMTKtACATYgTKAGGaCtTaCaTGSgtGa     |     |     |     |     |     |     |     |
| JH1-4 region (1>2592)       | → | ggcagtcagaggctagctgcctgtggaacagtg-acaatcatgaaaaataggcatttacattgttagg-ctacatgggtaga    |     |     |     |     |     |     |     |
| 447VH558-VH558.ab1 (24>789) | → | GACTGT-AGA--C-A-CATCCTCCAGCACAGCCTACATTCa-GCTCAGCAG-CCTG-ACATC-TGAGGACT-C-TGCG--G-    |     |     |     |     |     |     |     |
|                             |   | 330                                                                                   | 340 | 350 | 360 | 370 | 380 | 390 | 410 |
|                             |   | TSKRITWYTGTRCa-CccAMtARAGGGRWCggTATKAtAGWcGKGACTACTTTGACTACTGGGGCCAAGGCACCWCTCTCAC    |     |     |     |     |     |     |     |
| JH1-4 region (1>2592)       | → | tgggtttttgtaca-cccactaaagggtgc--tatgatagt-gtgactactttgactactggggccaaggcaccactctcacc   |     |     |     |     |     |     |     |
| 447VH558-VH558.ab1 (24>789) | → | TCTATTACTGTGC--C--AA-AGAGGGAACGGTATTA-AGACGGGACTACTTTGACTACTGGGGCCAAGGCACCTCTCTCAC    |     |     |     |     |     |     |     |
|                             |   | 420                                                                                   | 430 | 440 | 450 | 460 | 470 | 480 | 490 |
|                             |   | AGTCTCCTCAGGTGAGTCCTTACAACCTCTCTCTTCTATTcAGCTTAMATAGATTTTACTGCAITTTGTTGGGGGGAAATGT    |     |     |     |     |     |     |     |
| JH1-4 region (1>2592)       | → | agtctcctcaggtgagtccttacaacctctctcttctattcagcttaaatagattttactgcatttgttgggggggaaatgt    |     |     |     |     |     |     |     |
| 447VH558-VH558.ab1 (24>789) | → | AGTCTCCTCAGGTGAGTCCTTACAACCTCTCTCTTCTATTcAGCTTACATAGATTTTACTGCAITTTGTTGGGGGGAAATGT    |     |     |     |     |     |     |     |
|                             |   | 500                                                                                   | 510 | 520 | 530 | 540 | 550 | 560 | 570 |
|                             |   | GTGTATCTGAATTTcAGGTcATGAAGGACTAGGGACACCTTGGGAGTCAGAAAGGGTCATTGGGAGCCCTGGCTGATGCAGA    |     |     |     |     |     |     |     |
| JH1-4 region (1>2592)       | → | gtgtatctgaatttcaggtcatgaaggactagggacaccttgggagtcagaaagggtcattgggagccctggctgatgcaga    |     |     |     |     |     |     |     |
| 447VH558-VH558.ab1 (24>789) | → | GTGTATCTGAATTTcAGGTcATGAAGGACTAGGGACACCTTGGGAGTCAGAAAGGGTCATTGGGAGCCCTGGCTGATGCAGA    |     |     |     |     |     |     |     |
|                             |   | 580                                                                                   | 590 | 600 | 610 | 620 | 630 | 640 | 650 |
|                             |   | CAGACATCCTCAGTCCcAGACTTCATGGCCAGAGATTATAGGGATCCTGGCCAGcATTGCCGCTAGGTCCCTCTCTTCTA      |     |     |     |     |     |     |     |
| JH1-4 region (1>2592)       | → | cagacatcctcagctcccagacttcatggccagagatttatagggatcctggccagcattgccgctaggtccctctcttcta    |     |     |     |     |     |     |     |
| 447VH558-VH558.ab1 (24>789) | → | CAGACATCCTCAGTCCcAGACTTCATGGCCAGAGATTATAGGGATCCTGGCCAGcATTGCCGCTAGGTCCCTCTCTTCTA      |     |     |     |     |     |     |     |
|                             |   | 660                                                                                   | 670 | 680 | 690 | 700 | 710 | 720 | 730 |
|                             |   | TGCTTTCTTTGTCCCTCACTGGCCTCCATCTGAGATAATCCTGGAGCCCTAGCCAAGGATcATTATTGTCAGGGGTCTAAT     |     |     |     |     |     |     |     |
| JH1-4 region (1>2592)       | → | tgctttctttgtccctcactggcctccatctgagataatcctggagccctagccaaggatcatttattgtcagggtctaat     |     |     |     |     |     |     |     |
| 447VH558-VH558.ab1 (24>789) | → | TGCTTTCTTTGTCCCTCACTGGCCTCCATCTGAGATAATCCTGGAGCCCTAGCCAAGGATcATTATTGTCAGGGGTCTAAT     |     |     |     |     |     |     |     |
|                             |   | 740                                                                                   | 750 | 760 | 770 | 780 | 790 | 800 | 820 |
|                             |   | CATTGTTGTcACAATGTGCCTGGTTTGCTTACTGGGGCCAAGGGACTCTGGTCACTGTCTCTGCAGGTGAGTCTCTAACTTCT   |     |     |     |     |     |     |     |
| JH1-4 region (1>2592)       | → | cattgttgtcacaatgtgcctggttggcttaactggggccaagggaactctggtcactgtctctgcaggtgagtcctaaactct  |     |     |     |     |     |     |     |
| 447VH558-VH558.ab1 (24>789) | → | CATTGTTGTcACAATGTGCCTGGTTTGCTTACTGGGGCCAAGGGACTCTGGTCACTGTCTCTGCAGGTGAGTCTCTAACTTCT   |     |     |     |     |     |     |     |
|                             |   | 830                                                                                   | 840 | 850 | 860 | 870 | 880 | 890 | 900 |
|                             |   | CCcATTCTAAATGCATGTTGGGGGGATTCTGAGCCTTCAGGACCMAGATTCTCTGCAAAcGGGAATCAAGATTCAACCCctt    |     |     |     |     |     |     |     |
| JH1-4 region (1>2592)       | → | cccattctaaatgcattgttggggggattctgagccttcaggaccagagattctctgcaaacggggaatcaagattcaacccctt |     |     |     |     |     |     |     |
| 447VH558-VH558.ab1 (24>789) | → | CCcATTCTAAATGCATGTTGGGGGGATTCTGAGCCTTCAGGACCCAGATTCTCTGCAAAcGGGAATCAAGATTCAACCCctt    |     |     |     |     |     |     |     |

### Figure S2, cont

## G1XP 693: 1 mutation in J<sub>H1</sub> intronic region (marked by “\*”)

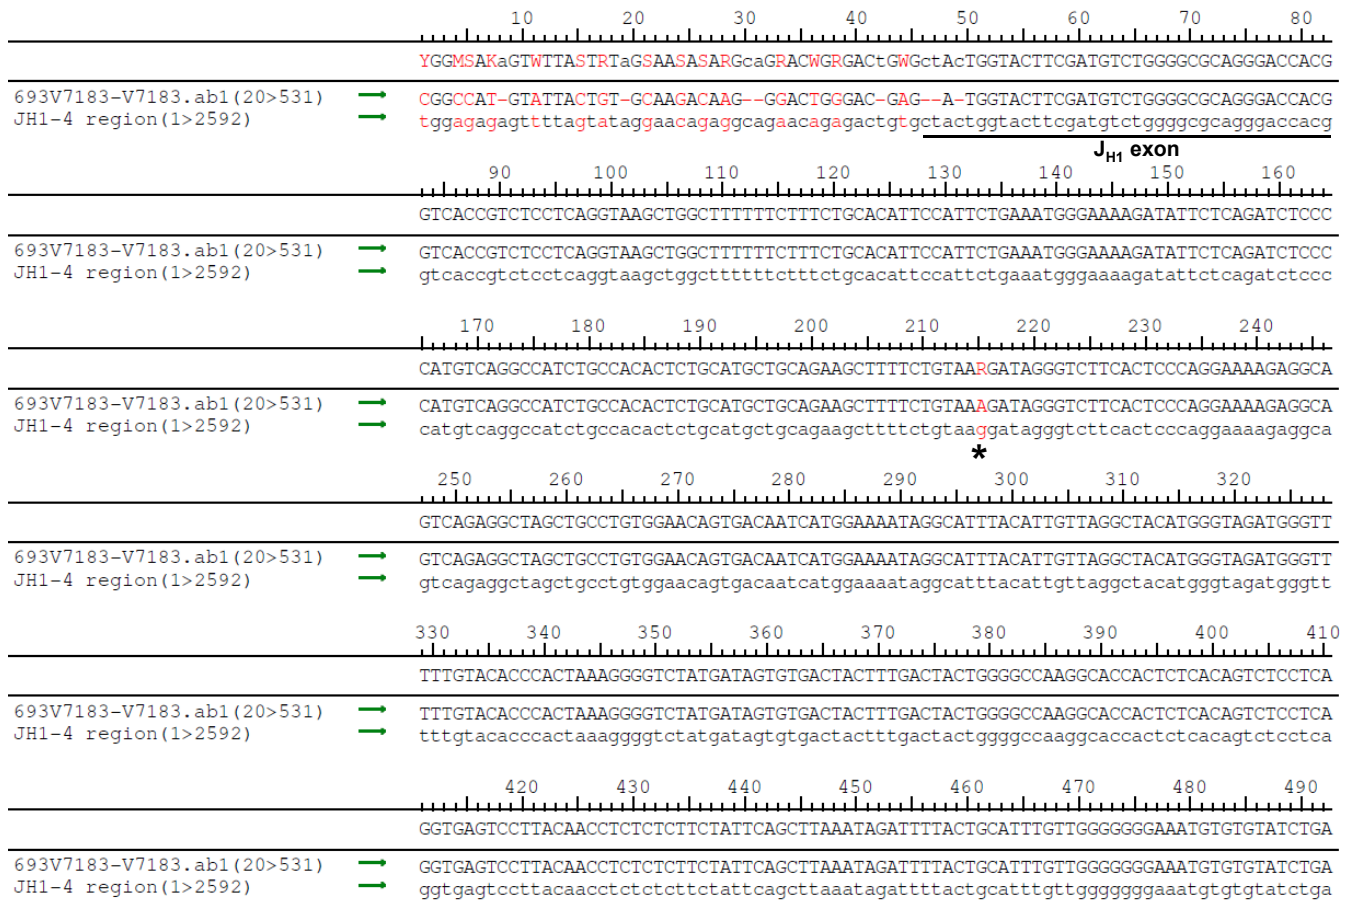

Figure S2, cont

### Junction 1: 46J\_DEL\_chr12:114667724 to chr12:114720381

5' TTTGTGAAGGGATCTACTACTGTGTTTATTACTACGGTAGTAGCTACGGGATACTTTGACTACTGGGGCC 70  
 o +-----+-----+-----+-----+-----+-----+-----+-----+-----+-----+  
 3' AAACACTTCCCTAGATGATGACACAAATAATGATGCCATCATCGATGCCCTATGAAACTGATGACCCCGG  
 o [RSS of DFL16.1] [DFL16.1 exon] [JH2]  
 1 F V K G S T T V F I T T V V A T G Y F D Y W G  
 2 L . R D L L L C F L L L R . . L R D T L T T G A  
 3 V C E G I Y Y C V Y Y Y G S S Y G I L . L L G P  
 o  
 5' AAGGCACCACTCTCACAGTCTCCTCAGGTGAGTCCTTACAACCTCTCTCTTCTATTTCAG  
 o +-----+-----+-----+-----+-----+-----+-----+-----+-----+-----+ 129  
 3' TTCCGTGGTGAGAGTGTCTCAGAGGAGTCCACTCAGGAATGTTGGAGAGAGAAGATAAGTC  
 o [JH2]  
 1 Q G T T L T V S S G E S L Q P L S S I Q  
 2 K A P L S Q S P Q V S P Y N L S L L F S  
 3 R H H S H S L L R . V L T T S L F Y S  
 o

### Junction 2: 125J\_DEL\_chr12:114666778 to chr12: 114816716

5' ATCTCCAGAGACAATACCAAGAAGACCCTGTACCTGCAAATGAGCAGTCTGAGGTCTGAGGACACAGCCT 70  
 o +-----+-----+-----+-----+-----+-----+-----+-----+-----+-----+  
 3' TAGAGGTCTCTGTTATGGTTCTTCTGGGACATGGACGTTTACTCGTCGAGACTCCAGACTCCTGTGTCGGA  
 o [Igh-V7183]  
 1 I S R D N T K K T L Y L Q M S S L R S E D T A  
 2 S P E T I P R R P C T C K . A V . G L R T Q P  
 3 D L Q R Q Y Q E D P V P A N E Q S E V . G H S L  
 o  
 5' TGTATTACTGTGCACGACCGGCGGTAGTATTACTATGCTATGCACTACTGGGGTCAAGGAACCTCAGTCA 140  
 o +-----+-----+-----+-----+-----+-----+-----+-----+-----+-----+  
 3' ACATAATGACACGTGCTGGCCGCCATCATAATGATACGATACGTGATGACCCAGTTTCTTGGAGTCAGT  
 o [Igh-V7183] [JH4 exon]  
 o [D region?]  
 1 L Y Y C A R P A V V L L C Y A L L G S R N L S H  
 2 C I T V H D R R . Y Y Y A M H Y W G Q G T S V  
 3 V L L C T T G G S I T M L C T T G V K E P Q S  
 o  
 5' CCGTCTCCTCAGGTAAGAATGGCCTCTCCAGGTCTTTATTTTAACTTTGTTATG  
 o +-----+-----+-----+-----+-----+-----+-----+-----+-----+-----+ 196  
 3' GGCAGAGGAGTCCATTCTTACCGGAGAGGTCCAGAAATAAAAAATTGGAAACAATAC  
 o [JH4 exon]  
 1 R L L R . E W P L Q V F I F N L C Y  
 2 T V S S G K N G L S R S L F L T F V M  
 3 P S P Q V R M A S P G L Y F . P L L .  
 o

Figure S3

**Junction 3: 202J\_DEL\_chr16: 19067135 to chr16:19085148**

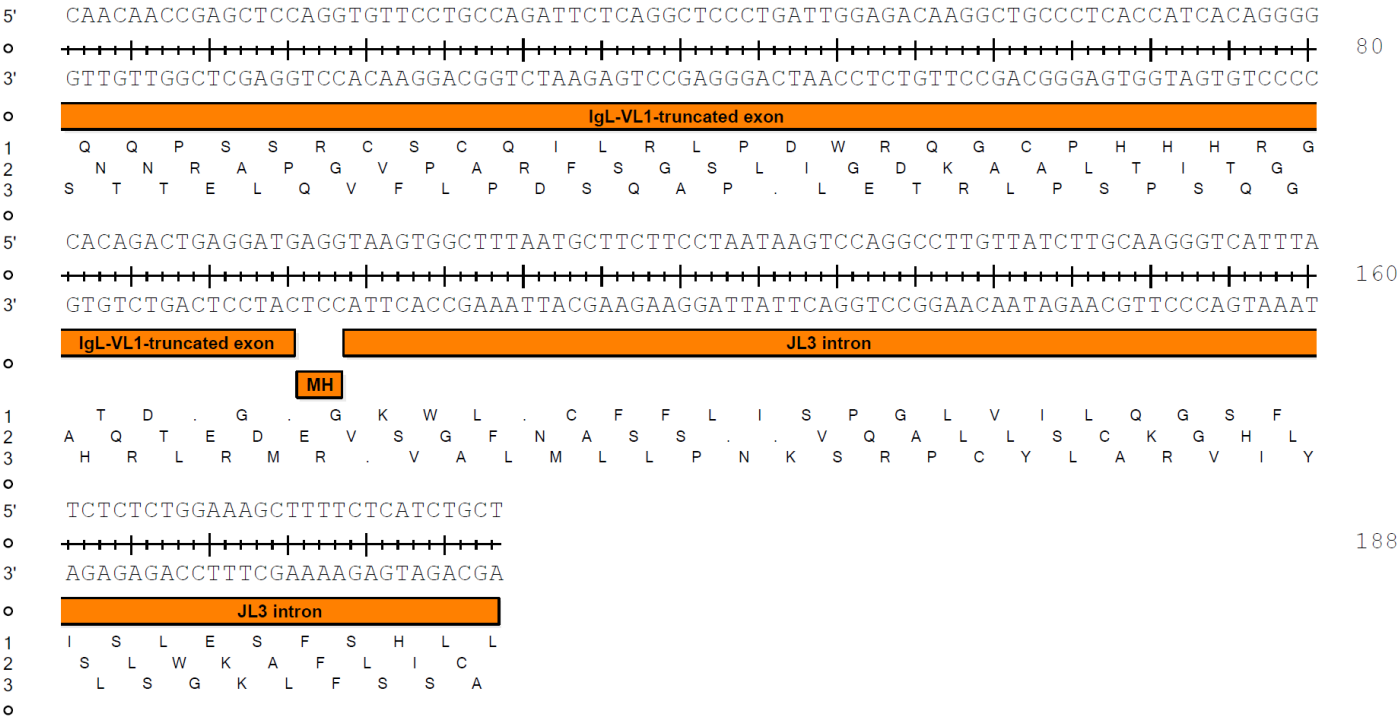

**Figure S3, cont**

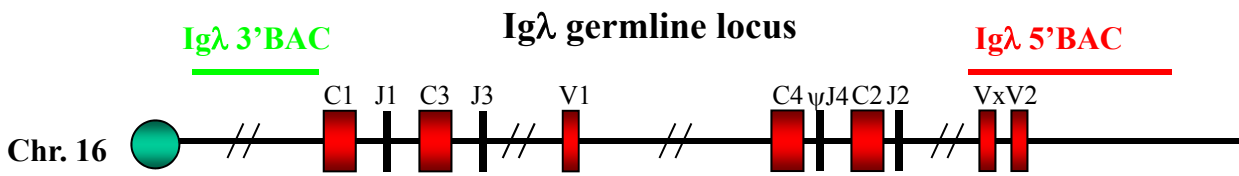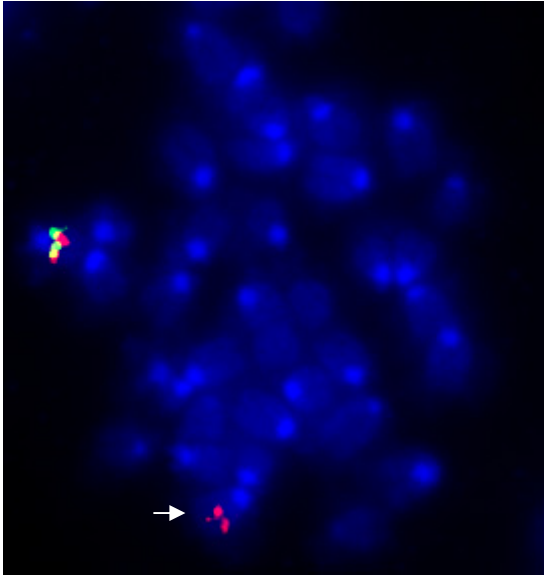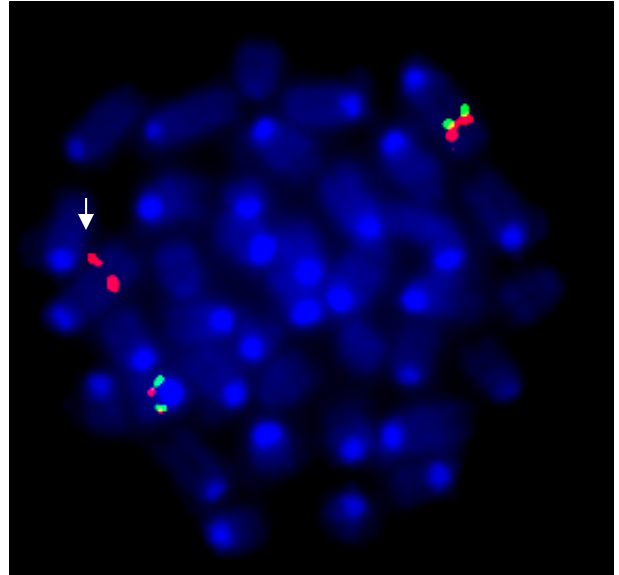

**Figure S4**

**Table S1: Phenotypic characterization of G1XP lymphoma via flow cytometry**

| ID          | B220     | CD22        | CD23         | CD24      | CD38     | CD43     | CD93      | CD138    | Igκ          | Igλ      | IgM      | IgA      | IgG1     | IgG2a/2b     | FAS         | PNA      |
|-------------|----------|-------------|--------------|-----------|----------|----------|-----------|----------|--------------|----------|----------|----------|----------|--------------|-------------|----------|
| <b>46J</b>  | positive | negative    | negative     | very high | positive | positive | very high | positive | negative     | negative | negative | negative | negative | negative     | negative    | negative |
| <b>119J</b> | positive | negative    | intermediate | positive  | positive | positive | positive  | positive | negative     | positive | negative | ND       | positive | ND           | negative    | ND       |
| <b>125J</b> | positive | pos and neg | negative     | positive  | positive | positive | positive  | positive | negative     | negative | negative | negative | negative | negative     | negative    | negative |
| <b>196J</b> | positive | negative    | negative     | positive  | positive | positive | positive  | positive | negative     | positive | negative | negative | positive | negative     | negative    | positive |
| <b>202J</b> | positive | negative    | negative     | positive  | positive | positive | positive  | positive | negative     | positive | negative | negative | positive | negative     | negative    | positive |
| <b>105J</b> | positive | negative    | negative     | positive  | positive | positive | positive  | positive | positive     | negative | positive | negative | negative | negative     | negative    | negative |
| <b>224J</b> | positive | negative    | negative     | positive  | positive | positive | positive  | positive | negative     | negative | negative | negative | negative | negative     | negative    | positive |
| <b>1J</b>   | positive | negative    | negative     | positive  | positive | positive | positive  | positive | negative     | negative | negative | negative | negative | negative     | negative    | positive |
| <b>164J</b> | positive | positive    | negative     | positive  | positive | positive | positive  | positive | intermediate | negative | negative | negative | negative | intermediate | pos and neg | positive |
| <b>76J</b>  | positive | positive    | negative     | positive  | positive | positive | positive  | positive | negative     | negative | negative | negative | negative | negative     | negative    | positive |
| <b>102J</b> | positive | negative    | negative     | positive  | positive | positive | positive  | positive | negative     | negative | negative | negative | negative | negative     | pos and neg | positive |

**Table S2: Summary of translocation involved *Igh* and *Igl* genes**

| Mouse ID | Junction# | Chr #: Coordinate | Left region gene Involved                        | Chr #: Coordinate | Right region gene Involved                                                                                             |
|----------|-----------|-------------------|--------------------------------------------------|-------------------|------------------------------------------------------------------------------------------------------------------------|
| 46J      | 1         | Chr12:114664185   | within S $\mu$                                   | Chr15:61816455    | Upstream of 1 <sup>st</sup> exon of c-myc                                                                              |
| 46J      | 2         | Chr12:114666343   | Between JH4 and E $\mu$ enhancer                 | Chr15:61815808    | Upstream of 1 <sup>st</sup> exon of c-myc                                                                              |
| 46J      | 3         | Chr12:114576833   | within S $\gamma$ 1 region                       | Chr15:61816454    | Upstream of 1 <sup>st</sup> exon of c-myc                                                                              |
| 46J      | 5         | Chr16:19260300    | 149bp dns of V $\lambda$ 2 of Ig $\lambda$ locus | ChrX:69535637     | 15539 bp at 5' side: gamma-aminobutyric acid (GABA-A) receptor and 88925 bp at 3' side: melanoma-associated antigen 10 |
| 46J      | 6         | Chr12:114793947   | Between Igh-V7183 and J <sub>H</sub> locus       | Chr17:77509610    | 1559676 bp at 5' side: protein FAM98A and 1098678 bp at 3' side: cysteine-rich motor neuron 1 protein precursor        |
| 46J      | 33        | Chr6:69318142     | Ig $\kappa$ locus, in V $\kappa$ cluster         | Chr8:75696092     | ND                                                                                                                     |
| 46J      | 38        | Chr12:116464670   | Upstream of Gm9227, between IghV8-6 and Ighv1-54 | Chr2:157854651    | Rprd1b                                                                                                                 |
| 46J      | 39        | Chr12:116852685   | Between Ighv1-68 and Gm5660                      | Chr1:82561682     | ND                                                                                                                     |
| 119J     | 9         | Chr12:114662370   | within S $\mu$ of Igh locus                      | Chr15:62002785    | Pvt1 locus                                                                                                             |
| 119J     | 10        | Chr12:114499669   | within S $\alpha$ of Igh locus                   | Chr15:62002643    | Pvt1 locus                                                                                                             |
| 125J     | 8         | Chr16:19085149    | V $\lambda$ 1 exon of Ig $\lambda$ locus         | Chr7:139481912    | ND                                                                                                                     |
| 125J     | 30        | Chr12:114892049   | 5' upstream of Igh-VQ52                          | Chr9:3486677      | ND                                                                                                                     |
| 125J     | 31        | Chr12:114663535   | within S $\mu$ region                            | Chr15:61815797    | Upstream of 1 <sup>st</sup> exon of c-myc                                                                              |
| 125J     | 32        | Chr12:117054332   | Upstream of Gm18341-pseduo gene and Ighv8-14     | Chr18:70277322    | ND                                                                                                                     |
| 125J     | 42        | Chr12:114658536   | 3' of C $\mu$ exon 4                             | Chr15:61810202    | Upstream of 1 <sup>st</sup> exon of c-myc                                                                              |
| 196J     | 7         | Chr12:114666491   | Between JH4 and E $\mu$ enhancer                 | Chr15:61816078    | Upstream of 1 <sup>st</sup> exon of c-myc                                                                              |
| 196J     | 28        | Chr12:114662359   | within S $\mu$ of Igh locus                      | Chr15:61816960    | Upstream of 1 <sup>st</sup> exon of c-myc                                                                              |
| 196J     | 29        | Chr12:117210092   | Upstream of Ighv1-83                             | Chr7:20527635     | ND                                                                                                                     |
| 196J     | 43        | Chr6:70148134     | between V8-26 and V8-21 of Ig $\kappa$ locus     | Chr19:27764973    | 261672 bp at 5' side: pumilio domain-containing protein KIAA0020 and 73308 bp at 3' side: transcription factor RFX3    |
| 202J     | 27        | Chr12:114631865   | Upstream of S $\gamma$ 3                         | Chr15:61816673    | Upstream of 1 <sup>st</sup> exon of c-myc                                                                              |

---

**Table S3: Validation of Translocations by PCR, Sanger Sequencing or FISH**

---

| <b>Junction</b> | <b>Mouse ID</b> | <b>Allele frequency</b> | <b>PCR</b> | <b>Sequence</b> | <b>FISH</b> |
|-----------------|-----------------|-------------------------|------------|-----------------|-------------|
| Junction 1      | 46J             | 0.33                    | Validated  | Validated       | Validated   |
| Junction 2      | 46J             | 0.26                    | Validated  | Validated       | Validated   |
| Junction 3      | 46J             | 0.75                    | Validated  | Validated       | Validated   |
| Junction 5      | 46J             | 0.30                    | Validated  | Validated       | ND          |
| Junction 7      | 196J            | 0.67                    | Validated  | Validated       | Validated   |
| Junction 8      | 125J            | 0.78                    | Validated  | Validated       | ND          |
| Junction 9      | 119J            | 0.83                    | Validated  | Validated       | Validated   |
| Junction 10     | 119J            | 0.82                    | Validated  | Validated       | Validated   |
| Junction 27     | 202J            | 0.75                    | ND         | ND              | Validated   |
| Junction 28     | 196J            | 0.67                    | ND         | ND              | Validated   |
| Junction 31     | 125J            | 0.38                    | ND         | ND              | Validated   |

---
